# Supplementary material for: Adenoviruses Using the Cancer Marker EphA2 as a Receptor In Vitro and In Vivo by Genetic Ligand Insertion into Different Capsid Scaffolds
Source: PubMed Central journal article supplement (PMC3997477; doi:10.1371/journal.pone.0095723), 2014-04-23

Fig. S5

**A**

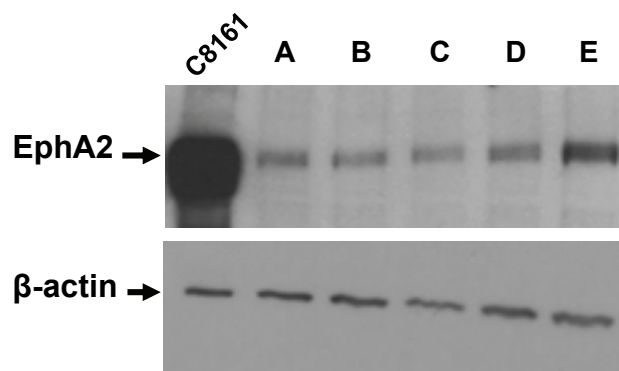

**B**

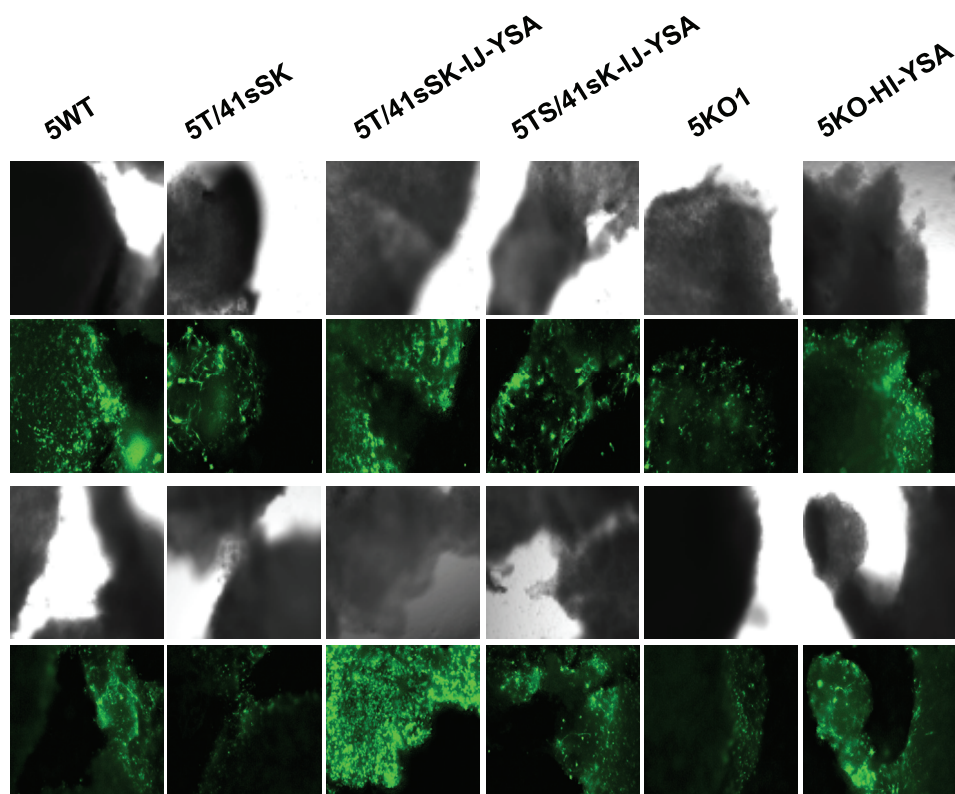

Supplement: pone.0095723.s005.pdf [file pone.0095723.s005.pdf]
